# Supplementary material
Source: Springer Nature journal article supplement (https://www.springermedizin.de/resource/supplementary/12872_2013_623_MOESM6_ESM.pdf/9430378)

**A**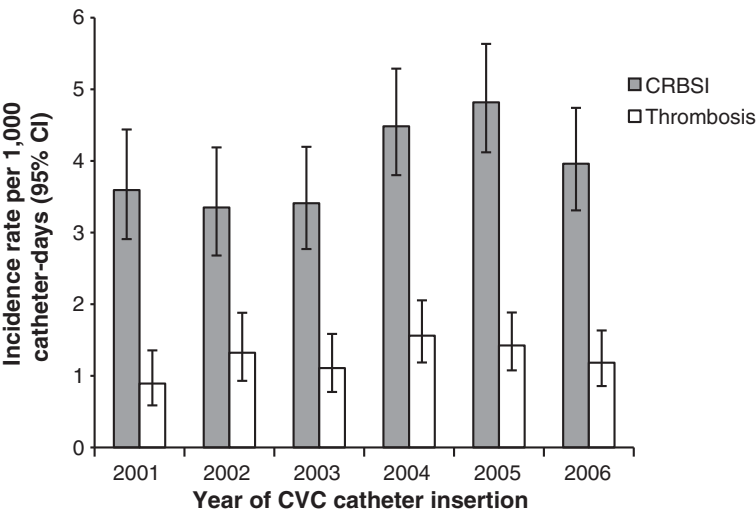**B**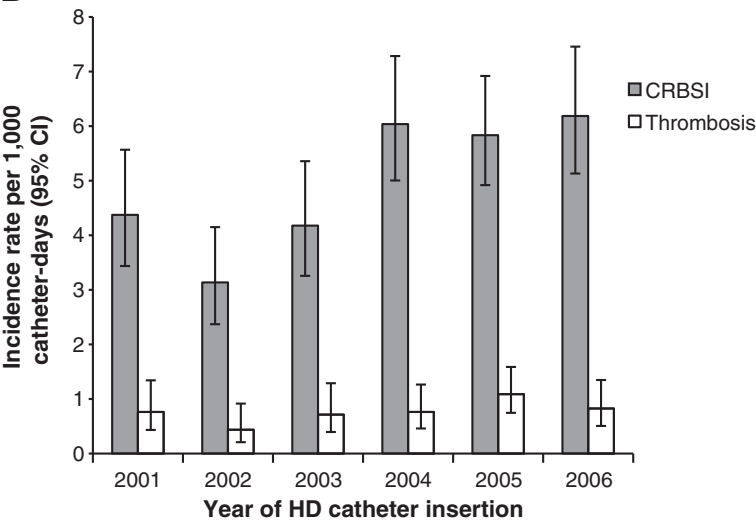

Supplement: MOESM6 [file 9430378]
